# Supplementary material for: Stabilization of XIAP mRNA through the RNA binding protein HuR regulated by cellular polyamines
Source: PubMed Central journal article supplement — Nucleic Acids Res. 2009 Oct 13;37(22):7623–37. doi: 10.1093/nar/gkp755 (PMC2794158; doi:10.1093/nar/gkp755), 2009-10-13
Supplement: gkp755_1.pdf [file gkp755_1.pdf]

**Supplemental Table-A1. Oligonucleotide Sequences of Primers for PCR**

| <b>Fragment</b>    | <b>Primers for Mapping XIAP Coding Region</b>                                      |
|--------------------|------------------------------------------------------------------------------------|
| <b>Full length</b> | F: (T7)5'-CAAGTTACATGTGAATTCTGCCAGGC-3'<br>R: 5'-CGATCTGTGAAAGAG CAGGCTCTGTACTC-3' |
| <b>F1</b>          | F: (T7)5'-TGACTTTTAAACAGTTTTGAAGGATCT-3'<br>R: 5'-TTCCAACAGCTGAGTCTCCAT-3',        |
| <b>F2</b>          | F: (T7)5'-GACACAGGAGAATATCCCCAAA-3'<br>R: 5'-ACTCTCTGGGGCTTAAATGG-3',              |
| <b>F3</b>          | F: (T7)5'-GCTAGTGCTGGACTCTACTACACG-3'<br>R: 5'-CTGAGTATAGCCATGTTCCAAAAG-3',        |
| <b>F4</b>          | F: (T7)5'-TGCAAGAGCTGGATTTTATG-3'<br>R: 5'-TTCCAAGTGAATGGGTTA-3',                  |
| <b>F5</b>          | F: (T7)5'-TCTGTGGTAAGAAGCTGCTGAAAA-3'<br>R: 5'-TCTTGTAGGCGCCTTAGCTG-3',            |
| <b>F6</b>          | F: (T7)5'-GCTTTGCAAATCTGTATGGA-3'<br>R: 5'-GCCTACTGT GGTGCTGGATT-3'                |

| <b>Fragment</b>    | <b>Primers for Mapping XIAP 3'-UTR</b>                   |
|--------------------|----------------------------------------------------------|
| <b>Full length</b> | F: (T7)TCCAGCACC ACAGTAGGCAT<br>R: TGGTAGTCCACCATTAG     |
| <b>F1</b>          | F: (T7)TCCAGCACC ACAGTAGGCAT<br>R: AGCTAAGATCGGGCATTACAG |
| <b>F2</b>          | F: (T7)CTGAATGCCCGATCTTAGCT<br>R: GTCAGTGTACTACAAATAT    |
| <b>F3</b>          | F: (T7) GTACACTGACTTGTTTT<br>R: TCCCTGCTTATACAGAACAC     |
| <b>F4</b>          | F: (T7) GTGTTCTGTATAAGCAGGGA<br>R: GAATCCTAAAACACAGA     |
| <b>F5</b>          | F: (T7) GTGTTTTAGGATTCTGTT<br>R: TGGTAGTCCACCATTAG       |

## Supplemental Table -A2. Potential HuR-hits in the XIAP Coding Region

331 atgactttta acagttttga aggatctaga  
361 actgttgtac ctgcagacac caataaggat gaagaatttg tagaagagtt  
411 Taatagatta aaaacatttg ctaacttccc aagcagcagt cctgtttcag  
461 catcaacatt ggcgcgagcg gggtttctct aactgggtga aggagacacc  
511 gtgcagtggt tcagttgtca cgcggcagta gatagatggc agtatggaga  
561 ctcagctggt ggaagacaca ggagaatatc cccaaattgc agatttatca  
611 atggttttta ttttgaaac ggtgccacac agtctacatc tcctggcatc  
661 caaaatggcc agtacaaatc tgaaaactgt gtgggaaaca gaaatcattt  
711 tgctcttgac aggccgtcgg agactcatgc agattatctc ctgagaactg  
761 gacaggttgt agatatttca gataccatat acccgaggaa cccggccatg  
811 tgtagtgaag aagccagact gaagacgttt cagaactggc cagactatgc  
861 ccatttaagc cccagagagt tagctagtgc tggactctac tacacgggga  
911 ttgatgatca agtgcaatgc tttgttgtg gtggaaact gaaaaattgg  
961 gaacctgtg accgtgcctg gtcagagcac aggagacact ttccaactg  
1011 cttcttcggt ttgggccgga atgttaatgt tcgaagtgag tctggtgtga  
1061 gttcagatag gaatttcca aattcaacaa attctccaag aaatccagcc  
1111 atggcagaat atgacgcacg gatcgttact tttggaacat ggctatactc  
1161 agttaacaag gagcagcttg caagagctgg attttatgct ttaggtgaag  
1211 gtgataaagt gaagtgcttt cactgtggag gagggctcac ggattggaag  
1261 ccaagtgaag acccttgga acagcatgct aagtggatc caggggtgtaa  
1311 atatctattg gatgagaagg gacaagaata tataaataat attcatttaa  
1361 ccatttact tggggaatct gtggaagaa ctgctgaaaa aacaccatca  
1411 gtaactaaaa aaatcgatga taccatcttc cagaatccta tggtgcaaga  
1461 agctatacga atgggattca acttcaagga catcaagaaa acaatggaag  
1511 aaaagctcca aacatctggg agcaactatc tatcacttga ggttctgatt  
1561 gcagatcttg tgagtgctca gaaagataat tcgcaggatg agtcaagtca  
1611 gacttcattg cagaaagaca tcagtactga agagcagcta aggcgcctac  
1651 aagaggagaa gctttgcaaa atctgtatgg atagaaatat tgctatagtt  
1711 tttgttcctt gtggacatct ggtcacttgt aaacagtgtg cggaaagcagt  
1761 tgacaaatgt cccatgtgct gcacagtcac tacgttcaag caaaaaattt  
1811 ttatgtcttaa

Computationally predicated hits of the HuR motif are indicated by underline in blue color

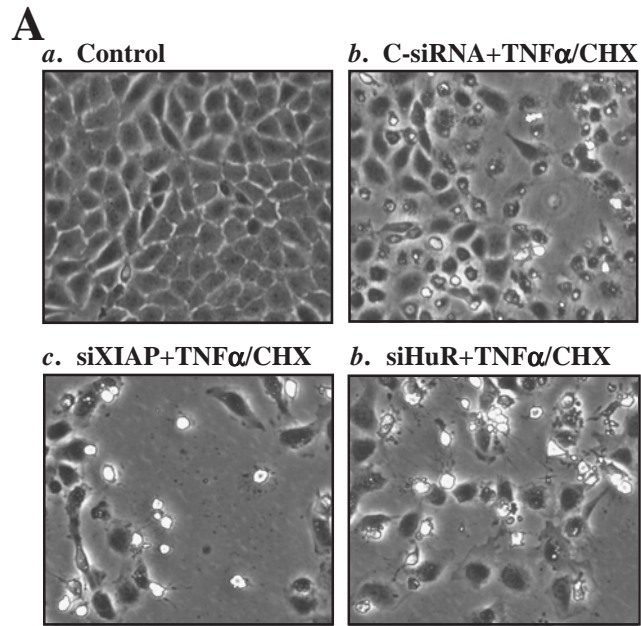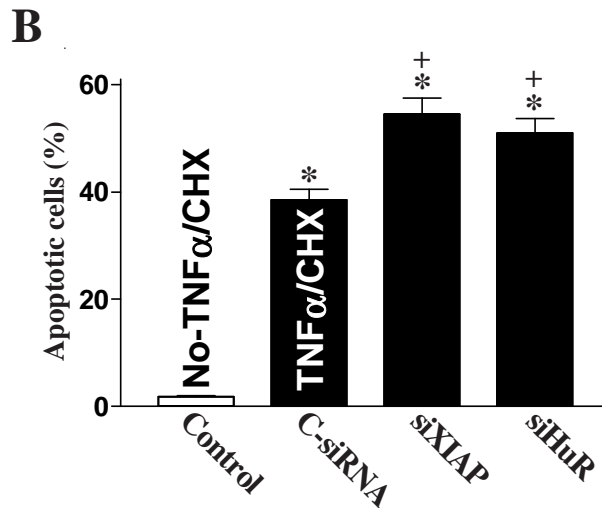

**Supplemental Figure A1.** Effects of XIAP silencing and HuR silencing on apoptotic sensitivity in normal IEC-6 cells (without DFMO). Cells were transfected with either siXIAP, siHuR, or C-siRNA for 48 h and then exposed to TNF $\alpha$ /CHX. (A) TNF $\alpha$ /CHX-induced apoptosis in controls and XIAP- or HuR-silenced populations: *a*), control cells; *b*) cells transfected with C-siRNA and then treated with TNF $\alpha$ /CHX; *c*), siXIAP-transfected cells treated with TNF $\alpha$ /CHX; *d*) siHuR transfected cells treated with TNF $\alpha$ /CHX. Apoptosis was measured by morphological analysis 4 h after treatment with TNF $\alpha$ /CHX. Original magnification,  $\times 150$ . (B) Percentage of apoptotic cells as described in A. Values are means  $\pm$  SE of data from six samples. \*  $P < 0.05$  compared with No-TNF $\alpha$ /CHX. +  $P < 0.05$  compared with cells transfected with C-siRNA and then treated with TNF $\alpha$ /CHX for 4 h.
